# Supplementary material for: Ionic liquid crystals derived from 4-hydroxypyridine
Source: Royal Society of Chemistry journal article supplement (doi:10.1039/c0sm01376e), 2011-01-01

## checkCIF/PLATON report

No syntax errors found.    CIF dictionary    Interpreting this report

### Datablock: jn07\_0m

---

Bond precision:    C-C = 0.0038 Å                      Wavelength=0.71073

Cell:                      a=20.7504(8)              b=7.9455(3)              c=13.4383(4)  
                            alpha=90                      beta=100.245(2)              gamma=90

Temperature:              296 K

|                        | Calculated        | Reported     |
|------------------------|-------------------|--------------|
| Volume                 | 2180.28(14)       | 2180.28(13)  |
| Space group            | P 21/c            | P2(1)/c      |
| Hall group             | -P 2ybc           | ?            |
| Moiety formula         | C21 H37 N O, H2 O | ?            |
| Sum formula            | C21 H39 N O2      | C21 H39 N O2 |
| Mr                     | 337.53            | 337.53       |
| Dx, g cm <sup>-3</sup> | 1.028             | 1.028        |
| Z                      | 4                 | 4            |
| Mu (mm <sup>-1</sup> ) | 0.064             | 0.064        |
| F000                   | 752.0             | 752.0        |
| F000'                  | 752.29            |              |
| h,k,lmax               | 24,9,16           | 24,9,16      |
| Nref                   | 3863              | 3846         |
| Tmin,Tmax              | 0.992,0.994       | 0.858,0.968  |
| Tmin'                  | 0.987             |              |

Correction method= EMPIRICAL

Data completeness= 0.996                      Theta(max)= 25.060

R(reflections)= 0.0473( 1361)              wR2(reflections)= 0.1543( 3846)

S = 0.767                                      Npar= 225

---

The following ALERTS were generated. Each ALERT has the format

**test-name\_ALERT\_alert-type\_alert-level.**

Click on the hyperlinks for more details of the test.

---

 **Alert level B**

PLAT026\_ALERT\_3\_B Ratio Observed / Unique Reflections too Low ....

35 Perc.

---

 **Alert level C**

ABSTY02\_ALERT\_1\_C An\_exptl\_absorpt\_correction\_type has been given without  
a literature citation. This should be contained in the

```
_exptl_absorpt_process_details field.  
Absorption correction given as empirical  
GOODF01_ALERT_2_C The least squares goodness of fit parameter lies  
outside the range 0.80 <> 2.00  
Goodness of fit given = 0.767  
PLAT250_ALERT_2_C Large U3/U1 Ratio for Average U(i,j) Tensor .... 2.04  
PLAT790_ALERT_4_C Centre of Gravity not Within Unit Cell: Resd. # 2  
H2 O
```

---

```
0 ALERT level A = In general: serious problem  
1 ALERT level B = Potentially serious problem  
4 ALERT level C = Check and explain  
0 ALERT level G = General alerts; check  
  
1 ALERT type 1 CIF construction/syntax error, inconsistent or missing data  
2 ALERT type 2 Indicator that the structure model may be wrong or deficient  
1 ALERT type 3 Indicator that the structure quality may be low  
1 ALERT type 4 Improvement, methodology, query or suggestion  
0 ALERT type 5 Informative message, check
```

---

### Publication of your CIF in IUCr journals

**A basic structural check has been run on your CIF. These basic checks will be run on all CIFs submitted for publication in IUCr journals (*Acta Crystallographica*, *Journal of Applied Crystallography*, *Journal of Synchrotron Radiation*); however, if you intend to submit to *Acta Crystallographica Section C* or *E*, you should make sure that full publication checks are run on the final version of your CIF prior to submission.**

### Publication of your CIF in other journals

**Please refer to the *Notes for Authors* of the relevant journal for any special instructions relating to CIF submission.**

---

**PLATON version of 22/10/2010; check.def file version of 11/10/2010**

Datablock jn07\_0m - ellipsoid plot

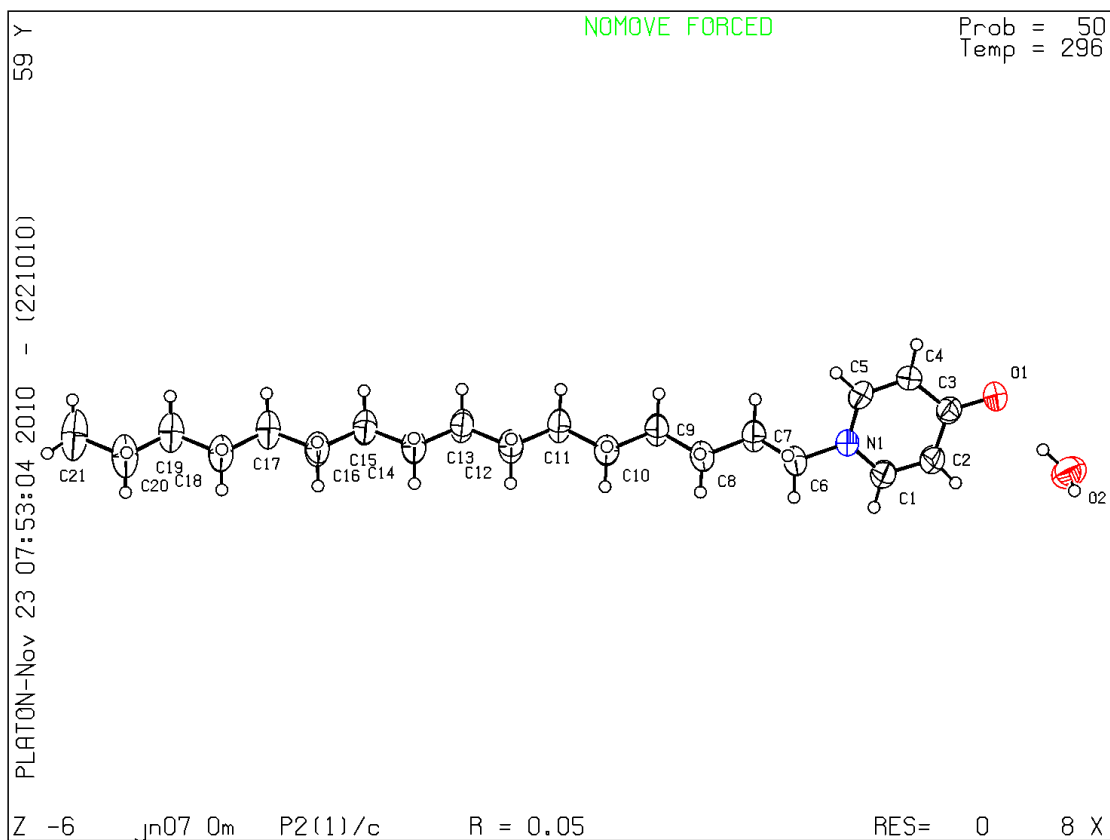

Supplement: c0sm01376e_802280.pdf [file c0sm01376e_802280.pdf]
