# Supplementary material for: Ionic liquid crystals derived from 4-hydroxypyridine
Source: Royal Society of Chemistry journal article supplement (doi:10.1039/c0sm01376e), 2011-01-01
Supplement: c0sm01376e_802279.pdf [file c0sm01376e_802279.pdf]

## checkCIF/PLATON report

No syntax errors found.      CIF dictionary      Interpreting this report

### Datablock: 41026am

---

Bond precision:    C-C = 0.0031 Å

Wavelength=0.71073

Cell:                a=5.0633(2)                b=7.8476(3)                c=28.8648(9)  
                      alpha=92.227(2)        beta=93.436(2)        gamma=102.045(2)  
Temperature:        273 K

|                | Calculated         | Reported       |
|----------------|--------------------|----------------|
| Volume         | 1118.12(7)         | 1118.12(7)     |
| Space group    | P -1               | P-1            |
| Hall group     | -P 1               | ?              |
| Moiety formula | C21 H38 N O, Cl, O | ?              |
| Sum formula    | C21 H38 Cl N O2    | C21 H38 Cl N O |
| Mr             | 371.97             | 355.97         |
| Dx,g cm-3      | 1.105              | 1.057          |
| Z              | 2                  | 2              |
| Mu (mm-1)      | 0.184              | 0.178          |
| F000           | 408.0              | 392.0          |
| F000'          | 408.44             |                |
| h,k,lmax       | 6,10,38            | 6,10,37        |
| Nref           | 5436               | 5404           |
| Tmin,Tmax      | 0.982,0.984        | 0.717,0.916    |
| Tmin'          | 0.982              |                |

Correction method= NONE

Data completeness= 0.994

Theta(max)= 28.040

R(reflections)= 0.0564( 3348)

wR2(reflections)= 0.1997( 5404)

S = 1.071

Npar= 229

---

The following ALERTS were generated. Each ALERT has the format

**test-name\_ALERT\_alert-type\_alert-level.**

Click on the hyperlinks for more details of the test.

---

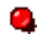

#### Alert level A

PLAT306\_ALERT\_2\_A Isolated Oxygen Atom (H-atoms Missing ?) .....

O2

---

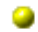

#### Alert level C

ABSTY03\_ALERT\_1\_C The \_exptl\_absorpt\_correction\_type has been given as none.

However values have been given for Tmin and Tmax. Remove

these if an absorption correction has not been applied.  
From the CIF: \_exptl\_absorpt\_correction\_T\_min 0.717  
From the CIF: \_exptl\_absorpt\_correction\_T\_max 0.916  
CHEMW03\_ALERT\_2\_C The ratio of given/expected molecular weight as  
calculated from the \_atom\_site\* data lies outside  
the range 0.99 <> 1.01  
From the CIF: \_cell\_formula\_units\_Z 2  
From the CIF: \_chemical\_formula\_weight 355.97  
TEST: Calculate formula weight from \_atom\_site\*  
atom mass num sum  
C 12.01 21.00 252.23  
H 1.01 38.00 38.30  
N 14.01 1.00 14.01  
O 16.00 2.00 32.00  
Cl 35.45 1.00 35.45  
Calculated formula weight 371.99  
CRYSC01\_ALERT\_1\_C No recognised colour has been given for crystal colour.  
PLAT431\_ALERT\_2\_C Short Inter HL..A Contact Cl1 .. O2 .. 3.15 Ang.  
PLAT041\_ALERT\_1\_C Calc. and Reported SumFormula Strings Differ ?  
PLAT043\_ALERT\_1\_C Check Reported Molecular Weight ..... 355.97  
PLAT068\_ALERT\_1\_C Reported F000 Differs from Calcd (or Missing)... ?

### Alert level G

FORMU01\_ALERT\_2\_G There is a discrepancy between the atom counts in the  
\_chemical\_formula\_sum and the formula from the \_atom\_site\* data.  
Atom count from \_chemical\_formula\_sum: C21 H38 Cl1 N1 O1  
Atom count from the \_atom\_site data: C21 H38 Cl1 N1 O2  
CELLZ01\_ALERT\_1\_G Difference between formula and atom\_site contents detected.  
CELLZ01\_ALERT\_1\_G ALERT: Large difference may be due to a  
symmetry error - see SYMMG tests  
From the CIF: \_cell\_formula\_units\_Z 2  
From the CIF: \_chemical\_formula\_sum C21 H38 Cl N O  
TEST: Compare cell contents of formula and atom\_site data  
  
atom Z\*formula cif sites diff  
C 42.00 42.00 0.00  
H 76.00 76.00 0.00  
Cl 2.00 2.00 0.00  
N 2.00 2.00 0.00  
O 2.00 4.00 -2.00  
PLAT072\_ALERT\_2\_G SHELXL First Parameter in WGHT Unusually Large. 0.12  
PLAT154\_ALERT\_1\_G The su's on the Cell Angles are Equal (x 10000) 200 Deg.  
PLAT199\_ALERT\_1\_G Check the Reported \_cell\_measurement\_temperature 273 K  
PLAT200\_ALERT\_1\_G Check the Reported \_diffrn\_ambient\_temperature 273 K

- 1 **ALERT level A** = In general: serious problem
- 0 **ALERT level B** = Potentially serious problem
- 7 **ALERT level C** = Check and explain
- 7 **ALERT level G** = General alerts; check

- 10 ALERT type 1 CIF construction/syntax error, inconsistent or missing data
- 5 ALERT type 2 Indicator that the structure model may be wrong or deficient
- 0 ALERT type 3 Indicator that the structure quality may be low
- 0 ALERT type 4 Improvement, methodology, query or suggestion
- 0 ALERT type 5 Informative message, check
